# Supplementary material for: Ethoxylated Butoxyethanol-BADGE Adducts—New Potential Migrants from Epoxy Resin Can Coating Material
Source: MDPI journal article supplement (doi:10.3390/ma14133682), 2021-07-01
Supplement: s1 [file s1]

Supplementary Material

# Ethoxylated Butoxyethanol-BADGE Adducts—New Potential Migrants from Epoxy Resin Can Coating Material

Monika Beszterda <sup>1</sup>, Małgorzata Kasperkowiak <sup>2</sup>, Magdalena Frańska <sup>3</sup>, Sandra Jęziołowska <sup>4</sup> and Rafał Frański <sup>4,\*</sup>

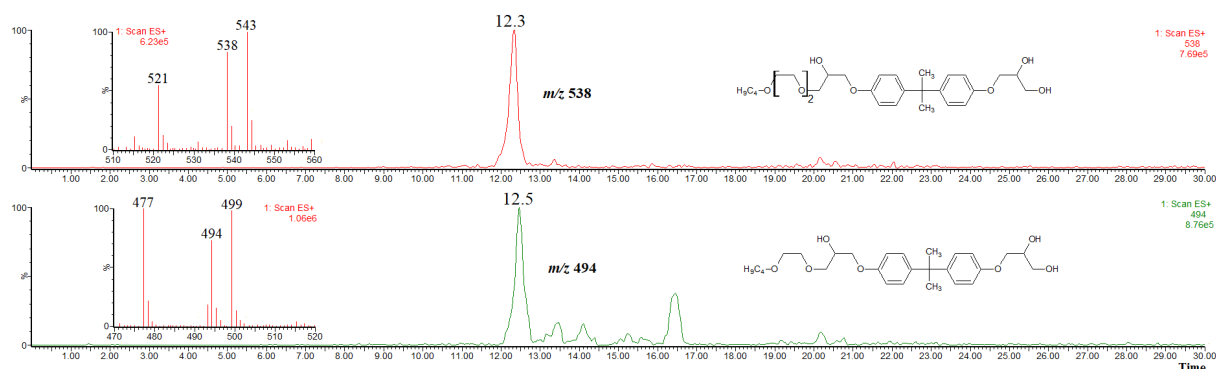

**Figure S1.** HPLC/ESI-MS detection of BADGE + BuEtOH + H<sub>2</sub>O (M=476) and BADGE + Bu(EtO)<sub>2</sub>H + H<sub>2</sub>O (M=520).

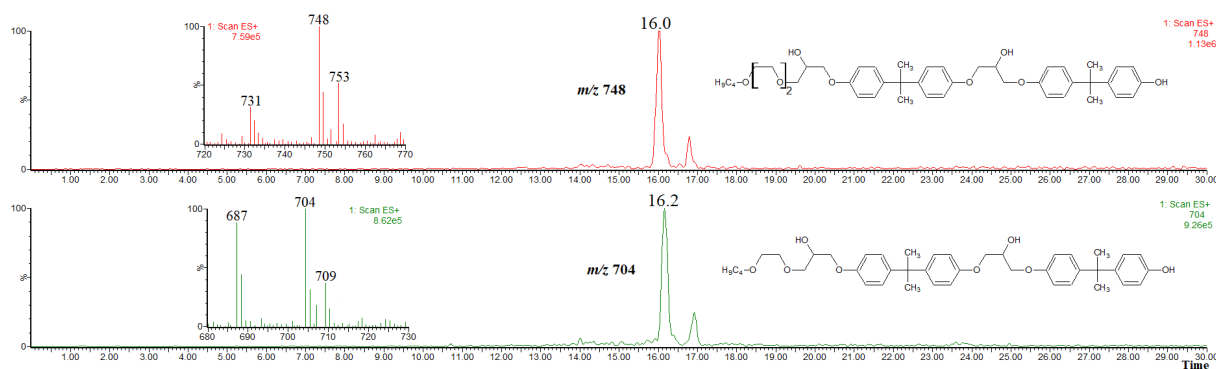

**Figure S2.** HPLC/ESI-MS detection of BADGE + BPA + BuEtOH (M=686) and BADGE + BPA + Bu(EtO)<sub>2</sub>H (M=730).

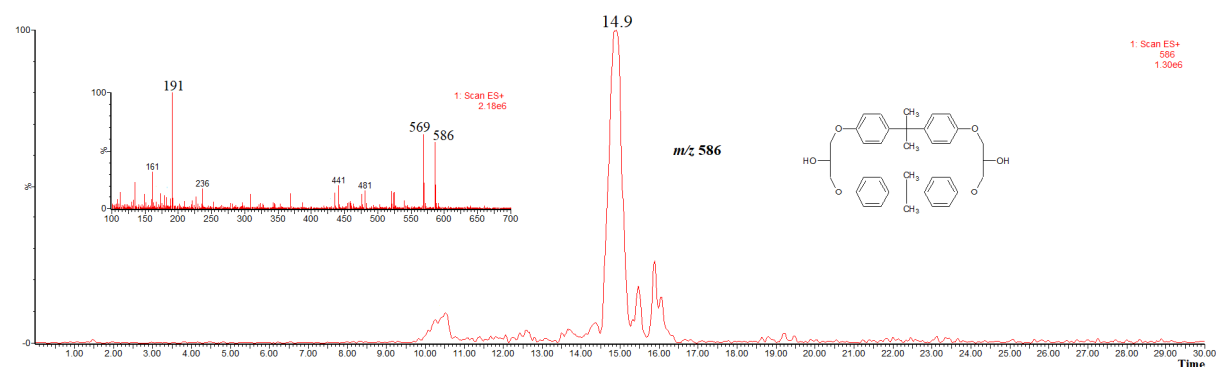

**Figure S3.** HPLC/ESI-MS detection of cyclo-di-BADGE (M=568). Beside the ions [M+H]<sup>+</sup> and [M+NH<sub>4</sub>]<sup>+</sup> (*m/z* 569 and 586, respectively) the abundant product ion at *m/z* 191 (characteristic for BADGE related compounds, [16]), has been observed.
